# Supplementary figures and images for: Diffusion coefficients and local structure in basic molten fluorides: in situ NMR measurements and molecular dynamics simulations
Source: Royal Society of Chemistry journal article supplement (doi:10.1039/b912532a), 2009-01-01

**S1 :**

The variation of  $D_F$ ,  $D_{Li}$  and  $D_{Be}$  in molten LiF-BeF<sub>2</sub>.

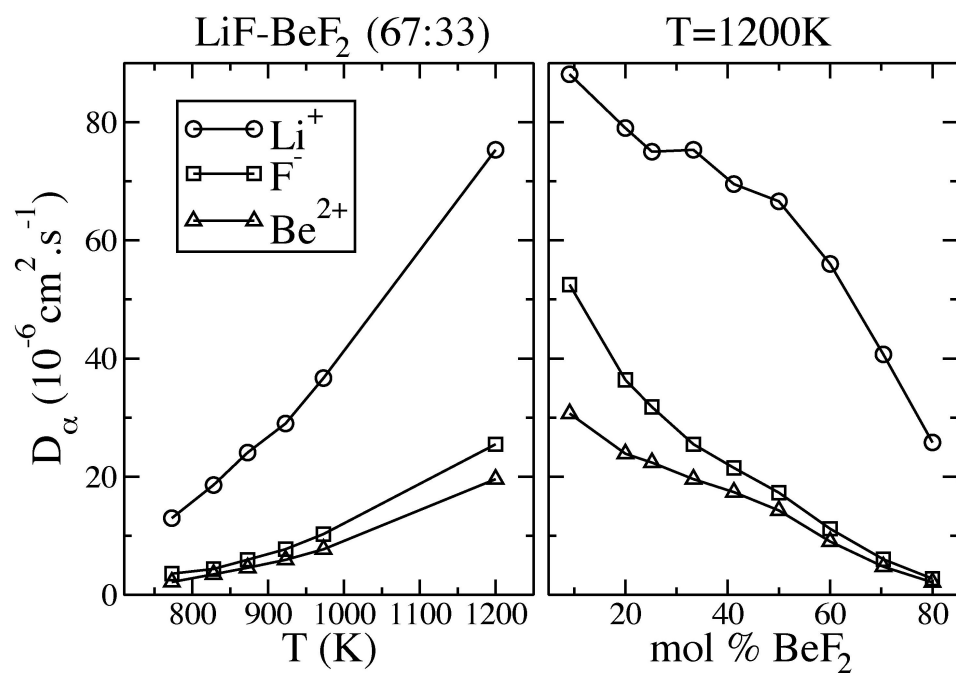

Supplement: b912532a.pdf [file b912532a.pdf]
